# Supplementary material for: Alleviating interpretational ambiguity in Hydrogeology through clustering-based analysis of transient electromagnetic and surface nuclear magnetic resonance data
Source: Copernicus journal article supplement (doi:10.5194/egusphere-2025-406), 2025-04-30
Supplement: Supplementary file [file egusphere-2025-406-AC2-supplement.pdf]

## Reviewer 2

The work that is presented in this manuscript is an important step towards an automated and thus fast hydrogeological interpretation of combined TEM and SNMR measurements. This combination has been applied in previous studies and has been proven to be powerful, especially within the frame of groundwater characterization in coastal areas, where the risk of relevant saltwater intrusion appears and frequently generates problems of freshwater production. In this environment, advanced knowledge of the aquifer situation, hydrogeologic modelling and temporal observation of the groundwater quality is desired and can most often not be realized by drilling boreholes alone.

Recent improvements of TEM and SNMR have enabled options to produce big datasets that need to be interpreted in time to gain real social, economic and ecologic relevance in supporting freshwater production. Consequently, automated approaches such as the one presented in this study are the next logical step to deal with such data. The paper represents a significant contribution within the field of hydrogeophysics and its application and consequently fits in very well with the HESS journal.

The manuscript is well structured and the principle path to the results and conclusions is easy to follow. The figures are well presented and helpful to understand the key messages. However, some important technical information and discussions are missing, especially on details of the implementation and performance of the K-means approach. As I understand the study, the focus is not on the verification of the approach, e.g. by concrete ground truthing which is difficult given the large spatial extent covered by the surveys, but rather the introduction of the principal strategy that has still potential to be further developed. Please read my detailed concerns and recommendations below.

In the presented case studies, the outcome of the clustering analysis is basically tested against the classical manual interpretation at the basis of the original data with only a few observation boreholes. These are not sufficiently distributed over the profiles to enable reliable validation to the full extent. Consequently, the discussion section should honestly admit that there are still significant uncertainties, which cannot be resolved for several reasons. Please find details below.

**Author response:** We take this important point into consideration and we have added a section in discussion to highlight sparse borehole coverage.

However, the focus of this work and the value of automated clustering approaches in general is not on interpreting local situations as accurately as possible, even if the data at the specific position possibly allows this, but on providing a reliable overview at a larger scale. In this sense, I want to encourage the authors to include such reasoning in their motivation and discussion. Again, please find details below.

Finally, I assess the necessary revisions of the manuscript into the category moderate-to-major.

**Author response:** Thank you for your comments. We have addressed the comments raised below and believe this has greatly improved the manuscript.

## Details

### P2L12-13:

... electrical properties of the subsurface, specifically the resistivity, are used ...

Author response: Fixed

**P2L22:**

A limitation of...

Author response: Fixed

**P2L23:**

The sentence starting with „An implication of ...“ is overloaded with redundancy and word repetitions. Please reformulate.

Author response: Sentence has been rephrased

**P2L24-27**

*“An implication of this is that local knowledge is required to link resistivity with the associated lithology or geological unit (Dickinson et al., 2010).”*

**P3L1:**

„...making it immeasurable with...“ => „...which makes the clay-bound water not detectable with...“.

Author response: Fixed

**P3L3:**

„established“ => „determined“

Author response: Fixed

**P3-Fig1:**

I like the idea of this scheme. However, I do not see the necessity of providing the axes as colorbars. It is rather confusing – I tried without any success to relate the font color inside the scheme to the colorbars of the axes. If you insist of using them, please clarify in the figure caption how they should be understood. Otherwise, I suggest avoiding them.

Please change the label of y-axis: „SNMR water content“ instead of „water content“ to avoid confusion or misconception. As you correctly describe in the main text, clay normally exhibits high water contents, but apparently appears as low or zero water content in SNMR.

Author response: We agree that the colorbars might be confusing. It was mostly to have presented the colorbars to the reader before they appear in the following figures. We have added a comment in the caption to indicate that the text colors are not related to the colorbar. We have added the new label.

Caption in Figure 1:

*“Figure 1 Different hydrogeological units resolved with TEM and SNMR. In dashed boxes, only one method is used, and the overlapping units show the ambiguities found.  $T_2^*$  can be implemented to further separate units. Colors in text are not related to colorbars.”*

**P5L5:**

Incorrect statement: the increased stacking rate leads to higher signal-to-noise ratios, not to higher signal amplitudes.

Author response: Fixed

**P5L11:**

Clarify with an additional brief sentence and a corresponding reference, why resistivity information is necessary for SNMR inversion.

Author response: Added a sentence and reference

P5L30-L32

*“Resistivity is needed to obtain the excitation fields used for kernel calculations (Braun and Yaramanci, 2008).”*

**P6L13:**

I am not familiar with K-means approaches. However, as far as I know, the performance of any optimization algorithm strongly depends on the chosen termination criteria. Please explain in more detail, here or later in the main text, how your approach actually performs. How many iterations were chosen exactly? Did you reach its maximum number for the majority of the runs or did the algorithm converge properly to the predetermined minimum distance? Can you quantify the minimum distance? Are there any criteria how to choose the minimum distance or is it rather a try-and-error process to find a proper threshold?

Author response: The max iterations was never reached as the standard is 300 iterations. This is actually not a minimum distance but rather a tolerance. This means that if the centroid difference between two iterations is below a certain tolerance, the stopping criteria is met. This has been changed and better explained in the manuscript. We used the standard set of tolerance and maximum iterations from scikit-learn package.

P6L34-P7L2

*“The total distance from all data to their assigned clusters is then iteratively minimized through updating cluster center locations until either the centroid difference between iterations varies below a set tolerance or a maximum number of iterations is reached.”*

**P7L8 (subsection 2.5)**

This subsection, in my opinion, should appear at the very beginning of the methods section. Explain first what you did and where, before going into detail on each measurement method and processing approaches.

Author response: We believe that the field description follows naturally after the methods as TEM and SNMR has already been explained at this stage. As the results section follows immediately after we have chosen to leave the order as is.

**P8L2**

Reading about „TEM soundings“ here is rather confusing – it indicates that you conducted the „traditional“ way of applying TEM. As I understand it, tTEM is rather a continuous sequence of TEM measurements while driving through the area. Please clarify.

Author response: Yes, indeed tTEM is a continuous sequence of TEM measurements. With soundings here, we mean every location linked to a single TEM model. For clarification we are writing TEM data now.

#### **Subsections 2.5.1 and 2.5.2:**

You already provide results, their interpretation and some conclusions here, while introducing the investigation areas. This is Okay in principle, if all this information has already been published. In this case, please specify the corresponding references. Otherwise, these statements belong to Section 3.

Author response: Only the Endelave NMR dataset has not previously been published. We have added a reference to the Endelave section for the TEM data.

P8L31-L33

*“The TEM data were acquired in April 2022 and cover the majority of the island and show  $\rho$  below 150  $\Omega$ m for the entire area (McLachlan et al., 2025).”*

#### **Subsection 3.1.1 (on the description of the silhouette index analysis and interpretation of Fig. 3)**

Unfortunately, some explanations in this passage remain unclear to me.

What exactly is the average silhouette index? Following the main text, it seems to be calculated for each cluster separately. But this is in contrast to the gray dashed lines in Fig.3 that represent a threshold for the whole data points in each subfigure. Moreover, it seems to be the very same value for each subfigure, no matter how many clusters are chosen - Is this plausible? Please clarify.

Author response: Thank you for this comment. From the other review, we have changed this figure to include the value of the average silhouette index in each subfigure. The average is calculated for each of the clustering runs (i.e., different for each subfigure). This value is used as a criterion for picking the number of clusters, the larger average silhouette index, the better.

Furthermore, when having a closer look at Fig.3, I cannot follow the classification of „well-, fairly and poorly defined“ that is made in the main text. It states for instance that cluster 1 in Fig.3b was well-defined (P8L22-24) but more than half of the data points in that cluster are below the average value, some points even appear with a silhouette index below 0. Following the definition in the main text this should be classified as a poorly defined cluster (P8L20: „...many data points below the average...“). Similar confusion appears for the interpretation of the other subfigures. However, maybe I had missed something relevant and completely misunderstood this analysis. Please clarify and reformulate the text accordingly.

Author response: This was also raised by the other reviewer. The definitions of well, fairly and poorly-clustered has been added to the clustering section in methods. And yes, for Fig 3b, cluster 1 is only fairly defined with between 30-50% of datapoints above the average silhouette index.

P7L21-L26

*“The preferred number of clusters is chosen based on two criteria. Firstly, the highest average silhouette index as indicates that datapoints in general have the highest membership score with the given number of clusters. Secondly, we look at each cluster and their silhouette index. If*

*more than 50% of the cluster is above the average silhouette index, the cluster is well-defined, between 30-50% the cluster is fairly defined, and below 30% it is poorly defined.”*

#### **P10-Fig4**

Please specify the abbreviations of the legend entries in the figure caption or provide a reference to table 1.

*Author response: We have added a reference to table 1*

#### **P11-Fig5 (and the other figures with profile data)**

Please consider indicating <N>orth and <S>outh directions at beginning and end of the profile(s) to make it easier to follow the interpretation(s) in the main text.

*Author response: We have added a note in the figure caption to direct the reader.*

#### **P12L11**

Following Archie's law, a change in water saturation should also lead to a contrast in rho. The fact that the change of water content measured by SNMR is not indicated by the TEM data is most likely due to the fact that TEM is not very sensitive to rho contrasts above 100 Ohm\*m. This information should be given beforehand together with a suitable reference, e.g. when describing the scheme in Fig.1.

*Author response: This was also raised by the other reviewer and a description of this has been added. It is likely due to the lack of sensitivity contrasts in TEM and not a lack of contrast in the resistivity itself.*

#### **P13L11-L13**

*“The very high  $\rho$  (above 300  $\Omega m$ ) is a product of very coarse material and that the TEM method can have limited sensitivity to determine resistivity above 150  $\Omega m$  (Christiansen et al., 2006).”*

#### **P12L13**

I do not doubt this statement, but you should provide a reference to verify it. There are some papers around that study the relationship between water saturation and relaxation time for loose sediments.

*Author response: We have added a reference on this (Falzone and Keating, 2016).*

#### **P13-Fig6 (same for Fig.10 and 11)**

I recommend focusing on T2\* alone in the lower subfigure(s) to avoid confusion. My first reaction was wondering what additional information the ratio of T2\* and T2 could provide. I guess there is no additional information in the T2 parameter compared to T2\*, right?

*Author response: Yes you are right. The T2 parameter does not hold extra information for this data set. Our focus is not T2 here, but for transparency we have elected to show both as we are inverting for it. Future implementation could have T2 as the main relaxation parameter for clustering.*

#### **P13L14**

Please describe more in detail how the error bars in Fig.6 must be understood and how the uncertainty in assigning the data to the clusters affects the uncertainty of the water table estimation. What means „the uncertainty bars are based on the layer thickness“? Is it identical with the layer thickness? In this case, one could assume that, in general, we just have to decrease the layer thicknesses in the inversion model to increase the accuracy of the water table estimation. This would be nonsense, of course!

*Author response: The uncertainty is assigned based on the layer thickness at the groundwater table depth. Since the layers are increasing in thickness, we expect the water table depth to be less accurate if not directly coinciding with the discretization. And yes, the error bars are directly the thickness of the layer in which the water table is found. As you mention, decreasing the layer thickness would not increase accuracy as the increased thickness reflects the decreased sensitivity at depth.*

**P17L5-L8:**

*“The red line has a slope of 1 and the uncertainty bars are equal to the inversion layer thickness at the transition depth, as the clustering method is ternary (i.e., it has three options) and consequently, some layers found at cluster transitions could be assigned to either cluster.”*

Sorry for stressing this aspect, but the confidence of non-invasive geophysical water table estimates is, in my experience, a frequent question in technical discussions with hydrogeologists. Your Figure 7 could be a key figure for the combined TEM/SNMR approach in this regard. However, it is not yet clear how to interpret it exactly.

And there is another aspect to consider when interpreting Fig.7. The water table is never identical with the interface between saturated and unsaturated zones. The saturated zone is always above the water table due to capillary forces. Depending on the lithology the difference between the two varies between a few cm (coarse sand) to several meters (till). Is such an interpretation of the discrepancy between the data points and the 1:1 line also reliable, given the actual geology?

*Author response: As geology is mostly coarse sands this effect might be minimal in these cases. Its more plausible that the discrepancy originates from the smoothing of inversion parameters and the brute thresholding from the clustering.*

**P13L21 and Fig.7**

I strongly recommend erasing the two yellow points from the crossplot. The attempt to verify the recent water table estimates with completely outdated information has no scientific value, even if it matched the 1:1 line by chance - which it obviously does not!

*Author response: These data points were included because of availability but we have now deleted them as requested.*

**P13L12**

Why do you not show the silhouette index plot for the Endelave site as well? Even if it was more complicated and difficult to interpret than for the case in Fig.3, the reader could learn a lot from it! How objective can the choice of the number of clusters even be? If an objective approach fails, we have to discuss criteria for subjective choices. As the number of clusters is crucial for this kind of analysis, I would expect a more detailed discussion on it for the two cases presented in this paper.

Author response: This decision was made to decrease the number of figures in the paper. We have added a section and the corresponding silhouette index figure for Endelave.

P19L3-L19

*“As before, we start by selecting the appropriate number of clusters, through silhouette index analyses, shown in **Error! Reference source not found.**.. Considering we expect a more heterogeneous geology, three to six clusters are used in the analysis. In **Error! Reference source not found.**, three clusters are used to partition the data, and result in one well-defined, one fairly-defined and one poorly-defined cluster, whereas the yellow has low and even negative silhouette values, indicating wrongly assigned data points. The average silhouette index is the highest found with the assigned clusters. By using four clusters in **Error! Reference source not found.b**, two are well-defined, one fairly and one poorly clustered. We see less negative silhouette index data here, while still maintaining a high average silhouette index. Further increasing the number of clusters to five reveals similar silhouette indexes but has two fairly-defined clusters, however the average silhouette index drops, see **Error! Reference source not found.c**. Using six clusters is similar with a few well-defined and fairly-defined, and with a lower average silhouette index. The silhouette analyses show that the number of clusters should either be three or four as they have well-partitioned clusters, with the highest silhouette index. Prior information from the area indicates that we have four distinct geological units: tills, sand aquifers, Paleogene clay, and possible saline intrusion into sand. The blue cluster in **Error! Reference source not found.b** was found to have important hydrogeological information, regardless of its low silhouette index and, as such, we used four clusters for further results.”*

P13L13

I recommend to erase the sentence „Consider Figure 8,...“. The wording is technical incorrect, because the clustering results cannot be represented by two parameters. It is always three parameters regardless of how they are depicted. However, the sentence is not necessary at all.

Author response: The sentence has been deleted.

P14L17

The red cluster might also include unsaturated sand or can you exclude this possibility for some reason?

Author response: Since all resistivities in the cluster is 120ohmm or below, it would be a quite conductive unsaturated sand. The till is somewhat sand rich, so the distinction between unsaturated sand and the unsaturated sandy till is limited.

P14L19

saturated sand aquifers

Author response: Fixed

P14L22

„could indicate“ => „indicates“

Author response: Fixed

## P15L2

„would indicate“ => „indicates“

Author response: Fixed

## P15-Fig8

Please specify the abbreviations in the legend.

Author response: Similarly to the previous comment, the table in which the abbreviations are stated has been referenced.

## P16L5

Okay, we learn later that unsaturated sand at this position is somewhat unreliable because of the borehole information. However, I miss a discussion in the paper about the resolution properties of the tTEM at shallow depths < 10 m. This is relevant for the interpretation of the near-surface till layer. TEM does obviously not resolve it, although one would also expect low resistivities here.

Author response: Some of these boundaries are difficult to identify in resistivity only as we have reduced resolution in high resistivity contrast limits mentioned previously. In this case, it is potentially a lack of resistivity contrast between the sandy aquifer and the till underlying it, not necessarily the TEM being insensitive to the shallow depths.

## P17L8

Figure 9a

Author response: Fixed

## P17L15

What does „due to shifts in geological deposits“ mean in this context? Please explain more in detail.

Author response: We agree that this phrasing is a bit tedious. There is some lateral changes in geology as indicated by the boreholes in this section, some showing sand, others till. Since the layer boundary from till to sandy aquifer matches the water table, this boundary is both the water table and a lithological boundary. We have deleted the last part of the sentence.

## P23L15-17

*“This is interpreted as a semi-confined system with the water table coinciding with a lithological layer boundary.”*

## P17L20

A few boreholes? There is only one borehole in the vicinity of sounding 1 and 2. Furthermore, I would expect a decrease in rho at the SA-TI interface. Again, this contrast can obviously not be resolved by the tTEM method in this specific case. However, in Fig. 6 we see that it resolves a rho contrast between SA and TI even at a similar depth. Why not here?

Author response: Yes, we have changed it to state that it is a single borehole. There is a small change between these two resistivities, but the main driver of the different clustering is the NMR



parameters. It is worth noting that the resistivity contrast between these two in Figure 6 is substantially larger and is therefore more clearly visible in the figure.

#### **P18-Fig10**

The reddish colors of Silt and Clay/till are difficult to distinguish in the figure. Please use another color for one of them.

Author response: The silt color has been changed in both sections to be consistent with color scheme.

#### **P19L4**

Please be precise! The organic matter does surely not lead to a drop in WC (the opposite is the case!), which is very obvious when inspecting the cited paper of Mashhadi et al. (2024). Similar to clay - also with gyttja it is actually not a „real“ but an apparent drop in WC caused by the fact that short T2\*/T2 times are not detectable with SNMR.

Author response: Yes, it is the SNMR detectable WC which drops and not the actual WC. We have rephrased this.

#### **P25L7-L9**

*“The gyttja layer found in the borehole coincides with a drop in the SNMR WC due to the increases in organic matter, decreasing the pore size, and was grouped with the Cl-cluster (Mashhadi et al., 2024).”*

#### **P19L18**

„might have“ => „might cause“

Author response: Fixed

#### **P20L8 – P21L6**

This passage is redundant with the descriptions in the introduction and can be removed from the discussion section completely. Please only discuss here what is new and implied by the direct results of your study.

Author response: We have rephrased and shortened this section to not be as long to shortly summaries the findings before proceeding to the specific discussion.

#### **P27L11-16**

*“In this study we investigated the use of clustering to combine the analysis of two geophysical methods, SNMR and TEM. The K-means clustering was found to be able to differentiate units into interpretable hydrogeological layers and was consistent with manual interpretations. Combining the datasets helped alleviate some of the ambiguities found when interpreting based only on a single dataset, i.e., unsaturated/confined conditions in Kompedal, and saltwater/freshwater in Endelave.”*

#### **P21L20**

As already mentioned (comment on **P12L13**), there are references to verify this statements. This is not a conclusion or finding of your study.

Author response: Reference has been added.

**P21L23**

„confidence in“ => „confidence of“

Author response: Fixed

**P2L26**

„reduce“ => „reducing“

Author response: Fixed

**P2L28**

„describe the most variance“ => „describe most of the variance“

Author response: Fixed

**P21L32**

„informed“ => „qualified“

Author response: Fixed

**P22L5**

provides

Author response: Fixed

**P22L29**

I strongly doubt that the suggested approach is strictly „non-subjective“, because of the crucial predefinition of the number of clusters (please see my comments on the silhouette index approach). Use „less-subjective“ or a formulation such as „towards a non-subjective interpretation“.

Author response: We have rephrased.

**P29L23-L26**

*“K-means clustering of complementary SNMR and TEM models is shown to provide a less-subjective approach, where enhanced hydrogeological interpretations can be formed by exploiting the complementary nature of two data types.”*

**P23L3**

I disagree with this statement! Only for one of the site, the silhouette index approach was introduced and described, at all, and even this is hardly comprehensible (see my comments on section 3.1.1). For the second site, the choice of the number of clusters seems rather arbitrary to me. Finally, no concluding remarks can be made about the robustness of the suggested approach. This is also true for the whole K-means algorithm as it is used here and remains an

objective for future research. The robustness could, for instance, be analysed in a pure synthetic parameter study.

Author response: We have rephrased this sentence. After introducing the silhouette index for Endelave, we believe it is now more appropriate.

P29L31-L34

*“A silhouette index-based approach, combined with the a priori knowledge of the likely number of lithological units present, was used to select the number of clusters and found to be suitable for these datasets.”*
